# Signal integration and information transfer in an allosterically regulated network

Erin M. Shockley<sup>a</sup>, Carol A. Rouzer<sup>a</sup>, Lawrence J. Marnett<sup>a</sup>, Eric J. Deeds<sup>c,d</sup>, and Carlos F. Lopez<sup>a,b,l</sup>

<sup>a</sup>Department of Biochemistry, Vanderbilt University, Nashville, TN 37212

<sup>b</sup>Department of Biomedical Informatics, Vanderbilt University Medical Center, Nashville, TN 37212

<sup>c</sup>Center for Computational Biology, University of Kansas, Lawrence, KS 66047

<sup>d</sup>Department of Molecular Biosciences, University of Kansas, Lawrence, KS, 66047

## ABSTRACT

A biological reaction network may serve multiple purposes, processing more than one input and impacting downstream processes via more than one output. These networks operate in a dynamic cellular environment in which the levels of network components may change within cells and across cells. Recent evidence suggests that protein concentration variability could explain cell fate decisions. However, systems with multiple inputs, multiple outputs, and changing input concentrations have not been studied in detail due to their complexity. Here, we take a systems biochemistry approach, combining physiochemical modeling and information theory, to investigate how cyclooxygenase-2 (COX-2) processes simultaneous input signals within a complex interaction network. We find that changes in input levels affect the amount of information transmitted by the network, as does the correlation between those inputs. This, and the allosteric regulation of COX-2 by its substrates, allows it to act as a signal integrator that is most sensitive to changes in relative input levels.

Keywords: network dynamics, allosteric regulation, systems biochemistry, Information theory, Cyclooxygenase-2

Many biological signaling networks process multiple inputs and yield multiple outputs. Examples of multiple-input multiple-output (MIMO) biochemical systems include the mitogen-activated protein kinase (MAPK) network, which can respond to numerous ligands and yield a range of outputs including proliferation and differentiation (Santos et al., 2007); the NF- $\kappa$ B pathway, which triggers pro- and anti-inflammatory responses to a variety of ligands (Lawrence, 2009); and myriad metabolic networks, which respond to multiple substrates and allosteric regulators by producing energy and the building blocks of cellular components (Lorendeau et al., 2015). Recent work (Adlung et al., 2017; Spencer et al., 2009; Shi et al., 2016; Huang, 2009; Waite et al., 2016; Mitchell et al., 2018; Chen et al., 2012) has highlighted the fact that modulation of input concentrations in intracellular networks can yield markedly different outcomes. Despite this clear indication that MIMO systems are crucial to biological processes, few reports exist to date to explain how multiple inputs modulate reaction flux and information flow in a network to allow signal processing with a range of adaptive outputs.

To explore the properties of MIMO systems in biology, we chose to study the dynamics of cyclooxygenase-2 (COX-2), a key enzyme that controls the balance between pro- and anti-inflammatory signals in mammalian organisms. COX-2 lies at the interface of the eicosanoid and endocannabinoid signaling pathways (Alhouayek and Muccioli, 2014; Rouzer and Marnett, 2011) and is itself the target of the widely used nonsteroidal anti-inflammatory drugs (NSAIDs). Although COX-2 is a structural homodimer, it behaves as a heterodimer. One subunit in the dimer harbors the catalytically active site, while the other subunit contains an allosteric site that modulates the overall activity of the enzyme (Dong et al., 2013, 2011; Kulmacz and Lands, 1984). An array of substrates, inhibitors, and allosteric modulators can bind to, and thus compete for, either site, giving rise to highly complex reaction kinetics (Kudalkar et al., 2015; Kulmacz and Lands, 1985; Mitchener et al., 2015; Rimon et al., 2010; Yuan et al., 2009; Dong et al., 2016a). The various products from COX-2 activity drive multiple downstream pro- and anti-inflammatory

34 processes that lead to diverse cellular fates including stress responses and apoptosis (Funk, 2001; Rouzer  
35 and Marnett, 2003; Smith et al., 2000).

36 It is clear that COX-2 orchestrates a complex interplay between a variety of substrates (the enzyme  
37 *inputs*), various allosteric regulators, and the concentration of downstream products (the enzyme *outputs*)  
38 that control processes such as inflammation (Funk, 2001; Rouzer and Marnett, 2003; Smith et al., 2000).  
39 Previously, most studies of COX-2 function have used simplified models based on Michaelis-Menten  
40 kinetics (Briggs and Haldane, 1925). Not surprisingly, these approaches have proved insufficient to  
41 capture the rich complexity of the COX-2 network of reactants, intermediates and products (Mitchener  
42 et al., 2015). We posit that a systems approach to understand COX-2 mechanism will improve inhibitor  
43 design to achieve desired outcomes in clinical settings.

44 COX-2 activity also represents an ideal model system to study the detailed dynamics of a biological  
45 MIMO system. As a single enzyme, it is sufficiently simple to allow for the construction, simulation and  
46 parameterization of a detailed systems biochemistry model that can capture all of the relevant transitions  
47 between intermediates and products. Nonetheless, it is sufficiently complex that it represents a non-trivial  
48 example of how multiple inputs lead to multiple outputs in a physiological context. We focus our study  
49 on the allosteric regulation network of COX-2 by two important substrates, arachidonic acid (AA) and  
50 2-arachidonoylglycerol (2-AG), which generate unusual dynamics in the COX-2 network when both are  
51 present (Mitchener et al., 2015). Levels of AA and 2-AG also vary widely *in vivo* (Seibert et al., 1997;  
52 Monjazebe, 2006; Sugiura et al., 2006), and it is unclear how such variation would influence COX-2 signal  
53 processing.

54 In this work, we analyze the execution mechanism of a biochemical reaction network with multiple  
55 inputs. Our work explains how a MIMO system integrates information on the concentration and nature  
56 of its substrates to yield potentially different outputs. In previous work, we developed a detailed model  
57 of the COX-2 reaction network that comprises all possible biochemical enzyme states dictated by AA  
58 and 2-AG occupancy of the allosteric or active sites, and all the kinetic transitions between these states  
59 (Mitchener et al., 2015). The reaction rate parameters for the kinetic system were determined using a  
60 Bayesian inference methodology (Shockley et al., 2017) to fit the model to experimental data on COX-2  
61 kinetics. This Bayesian approach produced an ensemble of model parameters that represent the uncertainty  
62 in the kinetic rates given the available data and restricts our analysis to plausible kinetic states of the  
63 network (Mitchener et al., 2015; Shockley et al., 2017). To explore the COX-2 MIMO signal processing  
64 mechanism, we first employed a graph-theoretic approach to enumerate all possible paths a substrate  
65 can take from reactant to product molecule. We found that changing the concentration of the inputs  
66 modulates not only the most dominant path that is taken by the system, but also the diversity of the paths  
67 the system employs. We also used an information-theoretic approach (Shannon, 1948) to understand the  
68 flow of information between network inputs, various intermediates, and the product outputs. This analysis  
69 reveals that competition between AA and 2-AG for the allosteric and active site generates highly complex  
70 concentration-dependence curves for COX-2 that are context-sensitive. In addition to providing insight  
71 into how COX-2 functions as a hub for the processing of inflammatory signals, our work suggests that  
72 our systems biochemistry framework provides useful information relevant to the study of other MIMO  
73 biological systems. This work also demonstrates that the extreme context-sensitivity of MIMO systems  
74 must be considered when attempting to modulate their behavior through targeted interventions.

## 75 RESULTS

### 76 A Mathematical Model of COX-2 Allostery and Catalysis

77 We built the COX-2 Reaction Model (CORM) (Fig. 1B) to understand how substrate-dependent allosteric  
78 regulation affects COX-2 catalytic rates (Mitchener et al., 2015). Here, we employ this model to study  
79 how multiple signals are processed in the context of a complex chemical reaction network, given a  
80 range of substrate concentrations and input correlations. Briefly, CORM encodes the reaction kinetics  
81 between COX-2 and two of its substrates: the fatty acid arachidonic acid (AA) and the endocannabinoid  
82 2-arachidonoylglycerol (2-AG). Both AA and 2-AG can bind at the catalytic and/or allosteric site on  
83 COX-2 with different affinities. At the catalytic site, AA is turned over to prostaglandin (PG) while 2-AG  
84 produces prostaglandin-glycerol (PG-G). Binding of either molecule at the allosteric site modulates the  
85 rate of catalysis (Mitchener et al., 2015). Although CORM includes only two substrates, the MIMO nature  
86 of COX-2 kinetics results in a complex network (Fig. 1B). CORM has been calibrated to experimental  
87 data using PyDREAM, a Bayesian parameter inference framework, to obtain the probabilistic likelihood

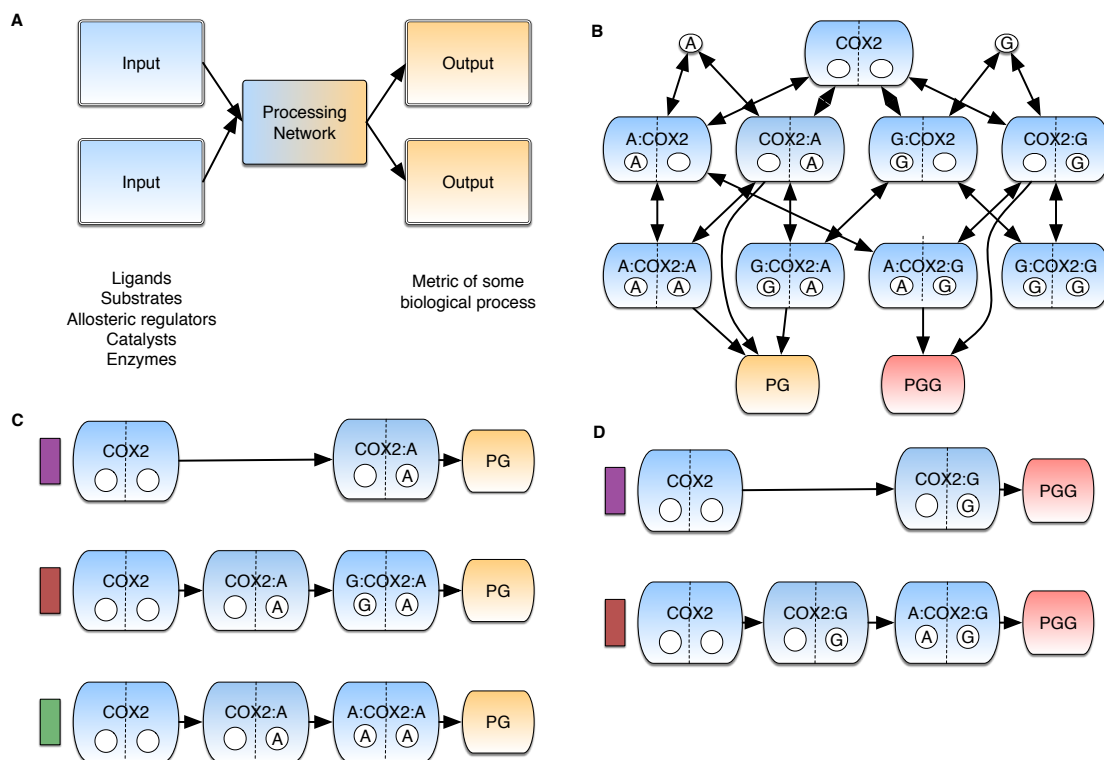

**Figure 1.** Network interactions within CORM. (A) The Multi-input Multi-output motif in a biological context. (B) The COX-2 Reaction Model (CORM) represents the network of interactions in the COX-2 system. The diagram depicts the possible biochemical states that the COX-2 enzyme (blue lozenges) can adopt through its allosteric (lower left circle) and catalytic (lower right circle) subunits, respectively. AA bound in either site is indicated with A and 2-AG with G within the circle. AA is turned over to produce prostaglandin (PG) and 2-AG is turned over to produce prostaglandin-glycerol (PG-G). Double-headed arrows indicate reversible reactions while single-headed arrows indicate irreversible reactions. Credible intervals for all fitted parameters are included in SI. (C) Dominant PG Production Paths in CORM. Colors correspond to path fluxes in Fig. 2A. (D) Dominant PG-G Production Paths in CORM. Colors correspond to path fluxes in Fig. 2B.

88 of parameters given experimental data, and information about the uncertainty in those parameter values  
 89 (Shockley et al., 2017). CORM is encoded in Python using PySB, which provides a flexible tool to query  
 90 the mixture of complexes present in the system at any time point given starting concentrations. Many  
 91 of these complexes would be costly or impossible to measure experimentally. Employing the Python  
 92 environment also facilitated the sophisticated analyses we present in this work (Lopez et al., 2013).

### 93 Substrate-Dependent Reaction Fluxes in Signal Execution

94 We first explored the net flow of reaction flux through the network using a graph theoretic approach to  
 95 calculate all possible paths between the unbound enzyme and each final product. Briefly, we evaluated  
 96 the system of ordinary differential equations (ODEs) in CORM at time intervals to extract the integrated  
 97 reaction flux at a given time point for each chemical reaction. We then built paths from product to reactant  
 98 following the reactions with net forward flux. Finally, we calculated the total chemical flux that passed  
 99 through a given path and used this as a measure of the probability of product formation via that path;  
 100 a detailed description of this procedure is given in SI Methods and Fig. S1. All fluxes were calculated  
 101 for the first ten seconds of catalysis after mixture with the substrates, a time chosen to match previous  
 102 experimental work (Mitchener et al., 2015). Path flux distributions were calculated for an ensemble of  
 103 calibrated parameter values to quantify path flux uncertainty arising from parameter uncertainty.

104 Our analysis indicates that there are six possible paths to produce PG (Fig. S2) and four possible paths  
 105 to produce PG-G (Fig. S3) for all evaluated substrate concentration combinations. However, not all paths

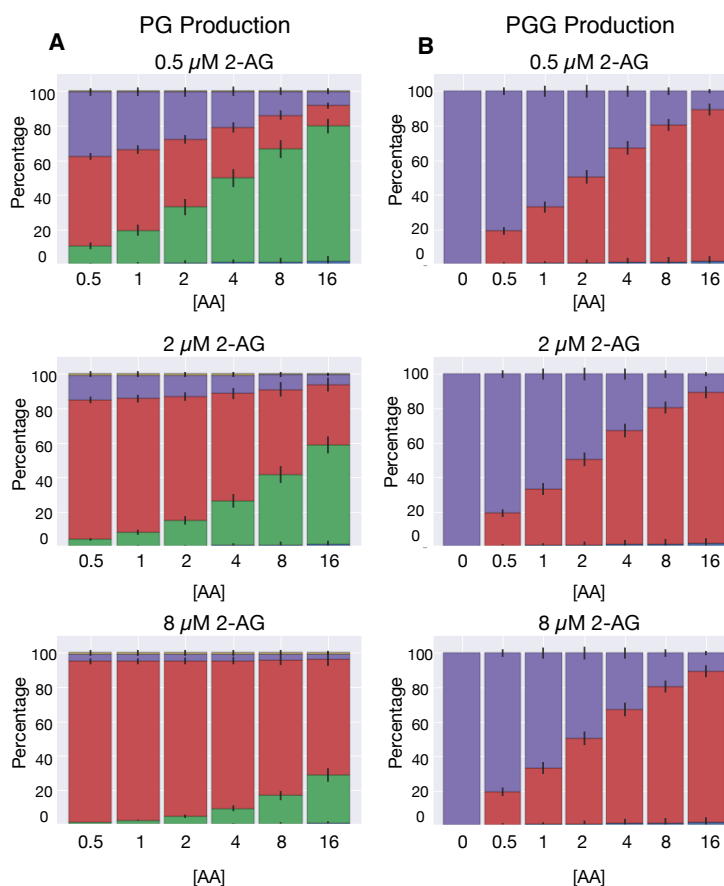

**Figure 2.** Concentration-dependent PG and PG-G production paths. (A) Dominant Reaction paths for PG Production Vary with AA and 2-AG Concentration. Each individual plot depicts the amount of flux through each path in 1C for a given concentration of 2-AG across varying concentrations of AA. Colors correspond to labeled paths in Fig. 1B. The error bars in each plot indicates the flux variation resulting from inferred kinetic rates. (B) Dominant Mechanisms of PG-G Production Vary with AA Concentration. Each individual plot is at a given concentration of 2-AG. In all plots AA increases from left to right at concentrations of 0.5, 1, 2, 4, 8 and 16  $\mu\text{M}$  in A and 0, 0.5, 1, 2, 4, 8, and 16  $\mu\text{M}$  in B. Colors correspond to labeled paths in Fig. 1C The error bars in each plot indicates the flux variation from inferred kinetic rates.

106 exhibit significant reaction flux during catalysis across all the concentrations. This occurs because paths  
 107 in which binding of a species to the allosteric site precedes binding to the catalytic site are kinetically  
 108 disfavored in CORM. As shown in Fig. 1C and 1D, three paths dominate PG production and two paths  
 109 dominate PG-G production. The dominant PG-producing paths (Fig. 1C) include those with one or  
 110 two intermediates, and the allosteric site empty or occupied by AA or 2-AG. Our results show that the  
 111 dominant path is highly dependent on the substrate input concentrations. The presence of AA and 2-AG in  
 112 the allosteric site enhances the production of PG (Mitchener et al., 2015). The dominant PG-G-producing  
 113 paths include one or two intermediates (Fig. 1D) with the allosteric site empty or occupied by AA. The  
 114 presence of AA in this site reduces the rate of PG-G production Mitchener et al. (2015). Similar to PG  
 115 production, we also found that the flux through each dominant path for PG-G production is dependent on  
 116 substrate concentration (Fig. 2).

117 In the absence of 2-AG and at low (0.5  $\mu\text{M}$ ) AA, PG is produced without allosteric modulation (Fig.  
 118 2A, purple; purple-labeled path in Figure 1C, top); as the concentration of AA increases, the proportion of  
 119 PG produced with AA as an allosteric modulator also increases (Fig. 2A, green). When 2-AG is added  
 120 to the system, PG production shifts to using 2-AG as an allosteric modulator (Fig. 2A, red), with this  
 121 path favored to a greater extent as the concentration of 2-AG increases (Fig. 2A, lower plots). Even in

122 the absence of 2-AG, about 20% of PG is produced by AA-modulated COX-2, and once even a small  
123 amount of 2-AG (0.5  $\mu\text{M}$ ) is added to the system, more than half of PG production occurs via a 2-AG or  
124 AA allosterically modulated path. In the presence of high concentrations of either modulator, as much as  
125 90% of PG is produced via an allosterically modulated path.

126 Because 2-AG and COX-2 display substrate-dependent inhibition (Mitchener et al., 2015), the  
127 production of PG-G occurs via fewer paths than are available to PG. In the absence of AA, all PG-G  
128 produced is generated in the absence of an allosteric modulator (Fig. 2B, purple), because the intermediate  
129 with 2-AG bound in both catalytic and allosteric sites is not turned over. As AA is added to the system,  
130 the proportion of PG-G produced by the AA-modulated pathway (Fig. 2B, red) increases. Thus, in the  
131 range of tested substrate concentrations, the dominant mechanism of PG-G production depends entirely  
132 on the amount of AA present in the system. Compared to PG, a smaller proportion of PG-G produced  
133 by the system results from an allosterically regulated pathway because PG-G is only created via the  
134 AA-modulated species or the allosterically unbound species. Nevertheless, at high concentrations of AA,  
135 again as much as 90% of PG-G is produced by AA-modulated COX-2. For paths containing a species  
136 bound in the allosteric site, binding at the catalytic site followed by binding at the allosteric site is the  
137 favored mechanism.

138 We note that at any given substrate concentration, the uncertainty arising from the calibrated kinetic  
139 parameter distributions never exceeds a 20% change in the percentage of product produced by a given  
140 path (Fig. S4-S8). We find that changes in substrate levels and their relative ratios have a much larger  
141 effect on the dominant reaction paths than changes in kinetic rates within the calibrated CORM parameter  
142 distributions. Overall, these findings suggest that variation of substrate concentrations in physiologically-  
143 relevant ranges has a significant impact on COX-2's mechanism of catalysis.

#### 144 **Pathway Entropy is Dynamic Across Input Concentrations**

Calculating the flux through each path allows us to obtain information about the preferred sequences of  
reactions that the system executes while processing AA and 2-AG. However, these measurements do not  
provide an estimate of how chemical traffic (i.e. the flow of chemical signals in the network) is distributed  
throughout the network. To explore the distribution of biochemical network traffic, we introduce the  
*pathway entropy* to quantify the degree to which COX-2 utilizes multiple paths at different concentrations  
of substrates. Our definition of entropy, originally introduced by Claude Shannon (Shannon, 1948)  
provides a measure of the uncertainty in a probability distribution across states as follows:

$$H = - \sum_{x=1}^n P(x_i) \log_2 P(x_i) \quad (1)$$

145 where  $H$  is entropy and  $P(x_i)$  is the probability of any state  $x_i$ . To determine the degree of uncertainty  
146 associated with product production (the pathway entropy), we considered each pathway as a state and use  
147 the fraction of flux that a given pathway contributes to the product as a measure for the probability of  
148 that state. This analysis yields a measure of how evenly distributed production is across possible paths.  
149 In general, evenly distributed fluxes across paths in a network would maximize pathway entropy for a  
150 multi-path system.

151 Since the dominant paths vary with substrate concentration (Fig. 2), we would expect that pathway  
152 entropy would also vary. In Fig. 3 we present the pathway entropy dependence on input concentration for  
153 PG (Fig. 3A) and PG-G (Fig. 3B). The pathway entropy for PG production is highest at intermediate levels  
154 of AA and low levels of 2-AG, while the pathway entropy is highest for PG-G production at intermediate  
155 levels of AA and any level of 2-AG. These maxima correspond to states where the reaction flux is most  
156 spread across the possible paths from reactant to product (see Fig. 2A, top plot, center, and Fig. 2B,  
157 top plot, center). In contrast, in the lowest entropy states - low AA and high 2-AG for PG (Fig. 2A,  
158 bottom plot, far left) and low AA across the entire 2-AG spectrum for PG-G (Fig. 2B, bottom row), flux is  
159 concentrated in a single or a few paths. Reaction flow is thus highly distributed in some conditions yet  
160 highly concentrated in one path in other conditions. This finding suggests that MIMO networks utilize  
161 multiple execution modes across input concentrations. It also suggests that approaches to modulate or  
162 inhibit network activity, which focus on disrupting one or more of these paths, may need to be tailored  
163 to specific conditions. These behaviors could have physiological relevance. For example, high-entropy  
164 conditions with highly redundant path fluxes may require multiple targets for inhibition compared to a  
165 condition with low entropy.

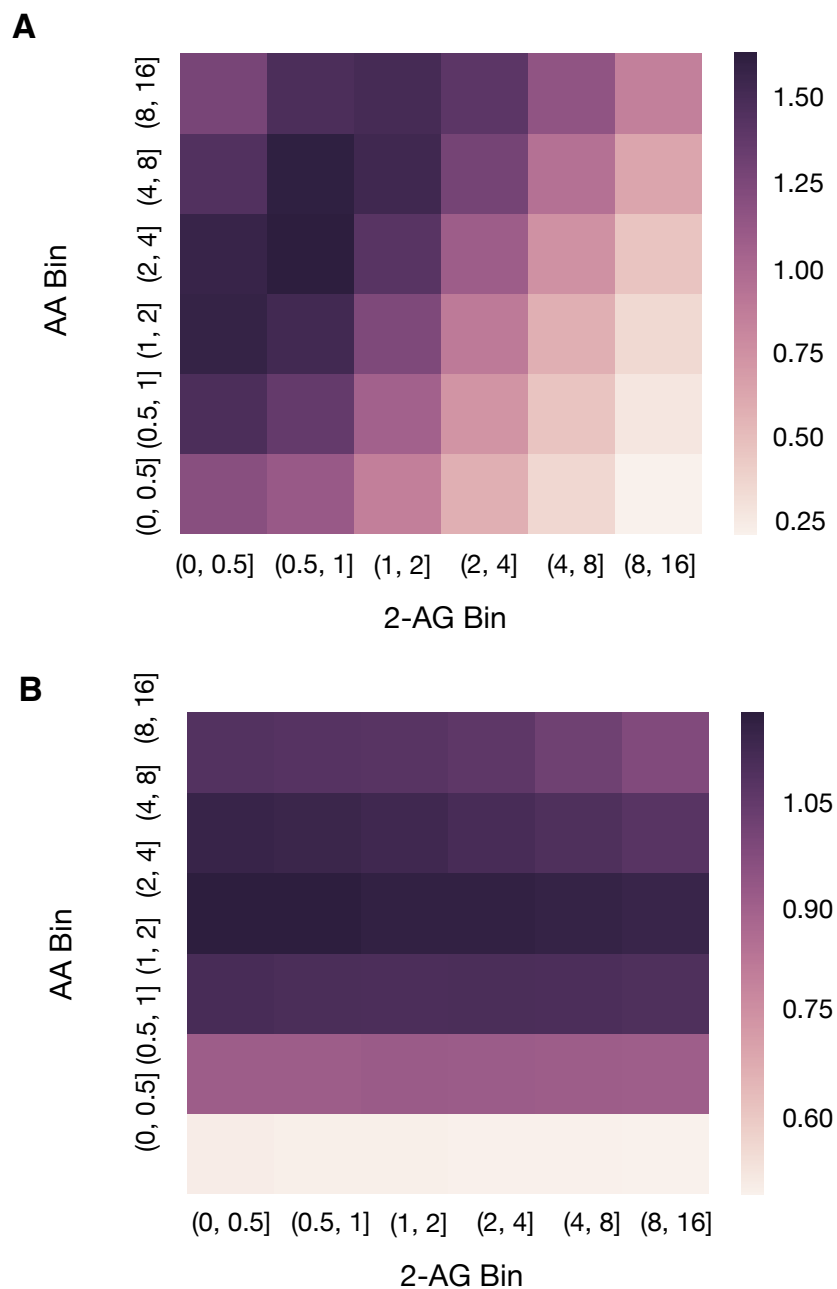

**Figure 3.** Pathway entropy within CORM. (A) Pathway Entropy for Production of PG. The intensity indicates the pathway entropy in units of bits. (B) Pathway Entropy for Production of PG-G. Units are the same as in A.



## 166 Input Output Behavior in CORM

167 The above findings on pathway entropy suggest a complex relationship between input concentrations,  
168 reaction intermediates, and product concentration in CORM. To understand these relationships, we next  
169 considered concentration-dependence curves derived from simulations using a fixed set of CORM kinetic  
170 parameters in which PG was calculated at increasing AA concentrations in the presence of random  
171 quantities of 2-AG (Fig. 4A) or PG-G was calculated at increasing 2-AG concentrations in the presence of  
172 random quantities of AA (Fig. 4B). Each data point was taken at steady-state (10 seconds) for consistency  
173 with experiments and previous work. Note that the presence of both substrates results in competitive  
174 inhibition with suppression of product formation from either one. Thus, the highest levels of output in  
175 each case occur when the concentration of the opposing substrate is low. These levels are similar for PG  
176 and PG-G because COX-2 utilizes the two substrates with similar catalytic efficiencies when they are  
177 present individually. As the concentration of the opposing substrate increases, competitive inhibition  
178 is partially balanced by positive allosteric modulation in the case of the conversion of AA to PG, but  
179 exacerbated by negative allosteric modulation in the case of the conversion of 2-AG to PG-G. Therefore,  
180 the suppression of PG-G formation is greater than that of AA formation as seen in the lower plateau level  
181 achieved in (Fig. 4B). In addition, the range of inputs over which the output varies depends significantly on  
182 which input/output pair is chosen (note the difference in that range in Fig. 4A,B). Clearly, variation of *both*  
183 inputs (e.g. changing AA *in addition* to changing 2-AG in Fig. 4A), results in significant variation in the  
184 outputs. Thus, while our simulations are deterministic, introducing uncertainty in the AA concentration  
185 generates a type of “extrinsic noise” in the relationship between 2-AG and PG-G (Fig. 4B), and *vice versa*  
186 for the impact of 2-AG on the relationship between AA and PG, Fig. 4A). This noise represents allosteric  
187 modulation in the network due to varying input concentrations.

## 188 Channel Capacity from Substrates to Products

To better understand how this output variation, combined with the shape of the concentration-dependence  
curves, influences the COX-2 reaction network, we applied an additional concept from information theory  
to measure dependence between inputs and outputs, namely the Mutual Information:

$$I(X;Y) = \sum_X \sum_Y P(x,y) \log_2 \frac{P(x,y)}{P(x)P(y)} \quad (2)$$

where  $X$  represents a given signal and  $Y$  the response to that signal (Shannon, 1948). Mutual information  
quantifies the degree to which one variable provides information about a second variable. Equivalently, it  
is a measure of how knowledge about one variable decreases uncertainty in the value of a second variable.  
For biological systems, quantifying mutual information is challenging because the input distribution is  
generally unknown. Previous work (Cheong et al., 2011; Selimkhanov et al., 2014; Suderman et al., 2017)  
has focused on estimating the “channel capacity,” which is the maximum information attainable across all  
possible input distributions:

$$C = \sup_{p_x(x)} I(X : Y) \quad (3)$$

189 Note that any practical calculation provides a lower bound estimate for the channel capacity  $C$ , since only  
190 a finite set of input distributions is used to estimate  $I$  (Suderman et al., 2017). We calculated channel  
191 capacities using the approach and software published in Suderman *et al.* (Suderman et al., 2017), which is  
192 similar to that used in Cheong *et al.* (Cheong et al., 2011).

193 We applied this estimate to two different sets of simulations. In the first set of simulations, we  
194 considered a case where AA and 2-AG are perfectly correlated with each other; to do this, we sampled  
195 the AA concentration from a uniform distribution on  $[0, 16 \mu M]$  and set the 2-AG concentration to  
196 be exactly the same. In the second set, we *independently* sampled the input AA and 2-AG substrate  
197 concentrations from a uniform distribution on the interval  $[0, 16 \mu M]$ . In each case, we sampled a total of  
198 500 distinct input conditions and ran CORM simulations to 10s to agree with experiments and previous  
199 work (Mitchener et al., 2015). The channel capacity was then estimated between the two different inputs  
200 (either AA or 2-AG) and every possible intermediate and product. The maximum theoretical channel  
201 capacity,  $\log_2(500) \approx 9$  bits, would be obtained if each of the 500 inputs yielded a distinct response. We  
202 repeated the channel capacity calculation for the top 5000 most probable parameter vectors from the  
203 calibrated parameter ensemble. This then allowed us to quantify the effect of kinetic parameter variation  
204 on channel capacities in the system. In total the analysis required approximately 1.5M CPU hours. An

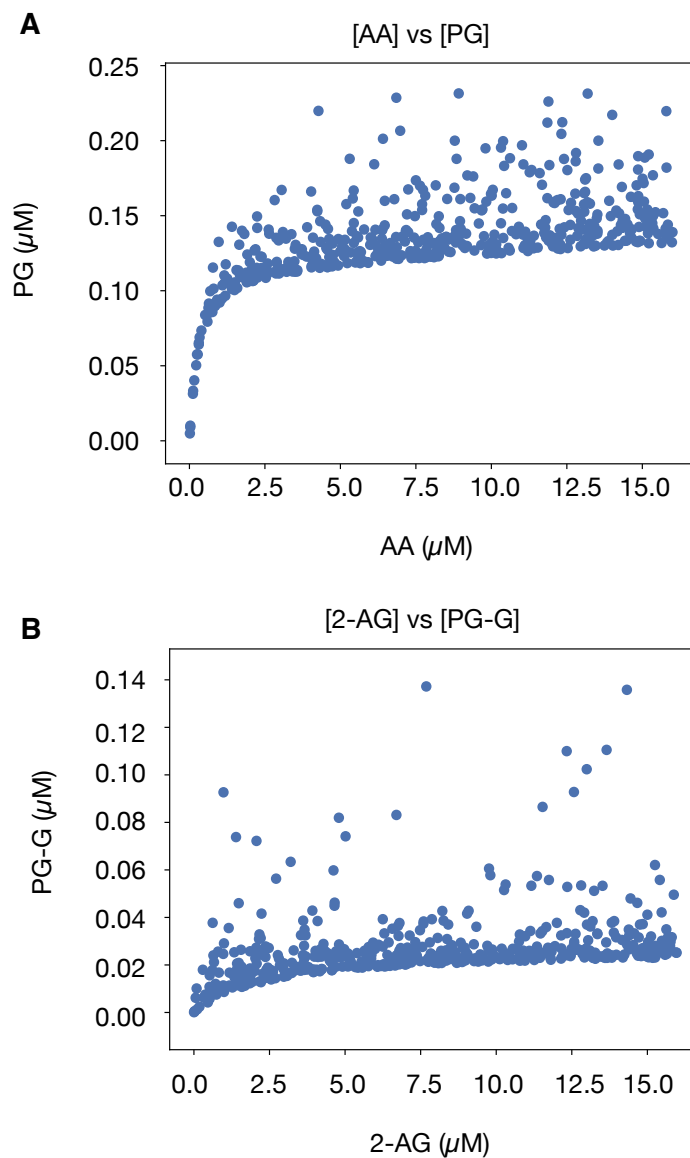

Figure

**Figure 4.** Input vs output plots for substrates and products in CORM. (A) Input vs Output plots for AA to PG. 2-AG varies randomly. All concentrations are measured at steady-state (10 seconds). (B) Input vs Output plots for 2-AG to PG-G. AA varies randomly. All concentrations are measured at steady-state (10 seconds).



205 example of input data used for calculating channel capacities from AA to PG and 2-AG to PG-G for a  
206 single parameter set is shown in Fig. 4. Greater detail is provided in the SI Methods.

## 207 **COX-2 Integrates Information from Both AA and 2-AG**

208 For ease of visualization, we estimated kernel densities of channel capacities given variation in calibrated  
209 kinetic parameters as shown in the violin plots in Fig. 5. In these plots, the data are represented by a  
210 central box plot that provides the mean, interquartile range and 95% credible interval, and the surrounding  
211 shape depicts the probability distribution, with wider regions indicating a higher probability. Because the  
212 input-output relationship in these simulations is deterministic, deviations from the theoretical maximum  
213 ( $\approx 9$  bits) arise from the two phenomena described above: either changes in the input do not really lead to  
214 significant changes in the output (*i.e.* the “flat” part of the concentration-dependence curves in Fig. 4) or  
215 the independent variation in one of the substrates generates variation in the output that is not due to the  
216 input being considered (*i.e.* the apparent noise in Fig. 4).

217 From Fig. 5, it is clear that the combination of these effects significantly reduces the observed channel  
218 capacities from the theoretical maximum. The highest observed value for any of the input/output pairs  
219 (AA to PG, 2-AG to PG-G, etc.) is at most half of the theoretical maximum (less than 4.5 bits). When input  
220 values are perfectly correlated ( $[AA] = [2-AG]$ ), Fig. 5A, the channel capacity between the (correlated)  
221 inputs and the outputs is between 3 and 4.5 bits (depending on the parameters), indicating that, while not  
222 perfect, the concentration-dependence curves allow for high levels of information flow between inputs  
223 and outputs. It is interesting to note that the uncertainty in the kinetic parameters leads to some variation  
224 in the calculated channel capacities; since the inputs here are correlated, this variation is due to changes  
225 in the shape of the concentration-dependence curves between data sets. Many channel capacities in the  
226 correlated case are bimodal, suggesting that two specific concentration-dependent curve shapes are most  
227 likely.

228 When the inputs are varied independently, channel capacity values decrease even further (Fig. 5B  
229 and C). The channel capacity between AA and PG or PG-G is generally less than 2 bits, and the channel  
230 capacity between 2-AG and those outputs is generally less than 1.5 bits. This could occur for two reasons.  
231 First, a lack of correlation could result in less entropy in the response (*i.e.* less uncertainty in the value of  
232 the product). Since the mutual information is limited by the response entropy (eq. 2, (Shannon, 1948;  
233 Cheong et al., 2011; Suderman et al., 2017)), this would cause a decrease in the mutual information.  
234 However, if the response entropy remains constant when there is no correlation between inputs, then  
235 mutual information can only decrease if information transfer through the network is less efficient. As  
236 shown in Fig. S9, the response entropy does not differ between the independent and correlated cases,  
237 indicating that independent variation in one of the inputs while the other input is known has a large effect  
238 on the output. In other words, COX-2 is truly an integrator of these signals, since accurate determination  
239 of the substrate concentrations given the output is considerably more difficult if the two substrates are  
240 independently varied.

241 Since perfect correlation and complete independence represent only the two extremes of the rela-  
242 tionship between AA and 2-AG concentration, we also investigated the behavior of the system when  
243 the inputs exhibit moderate correlation (Pearson correlation coefficient = 0.5), and when the inputs are  
244 consistently present in a 2-to-1 AA-to-2-AG ratio (Fig. S10 and Fig. S11). The behavior when input  
245 ratios were fixed was similar to that for the correlated values (when the input levels were fixed equal to  
246 each other); channel capacities were again higher than in the independent case and the effect of kinetic  
247 parameter variation on channel capacity was higher. When the inputs are moderately correlated, the  
248 system is still able to obtain high channel capacities for some kinetic parameter sets, although the overall  
249 distribution of channel capacities shifts to lower values compared to when input correlation is perfect,  
250 further confirming COX-2 input integration.

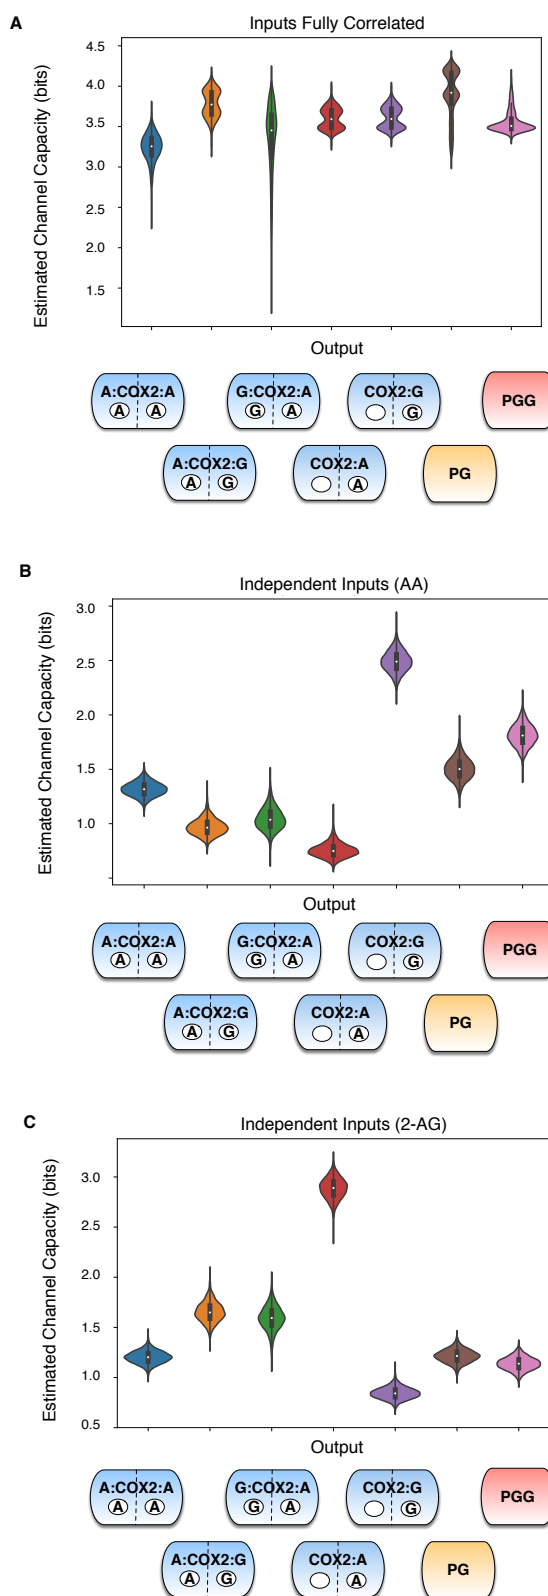

**Figure 5.** Estimated channel capacities from substrates to intermediates or products in CORM. (A) Estimated Channel Capacities from Input to intermediates and final products within CORM when levels of AA and 2-AG are strongly correlated (Pearson correlation coefficient = 1). Distributions in the channel capacities arise from uncertainty in the kinetic parameter values after model calibration. (B) Estimated Channel Capacities from AA to intermediates and final products within CORM when AA and 2-AG are varied independently. Distributions in the channel capacities arise from uncertainty in the kinetic parameter values after model calibration. (C) Estimated Channel Capacities from 2-AG to intermediates and final products within CORM when AA and 2-AG are varied independently. Distributions in the channel capacities arise from uncertainty in the kinetic parameter values after model calibration.

251 **Information Flow is Dictated by Substrate Concentration**

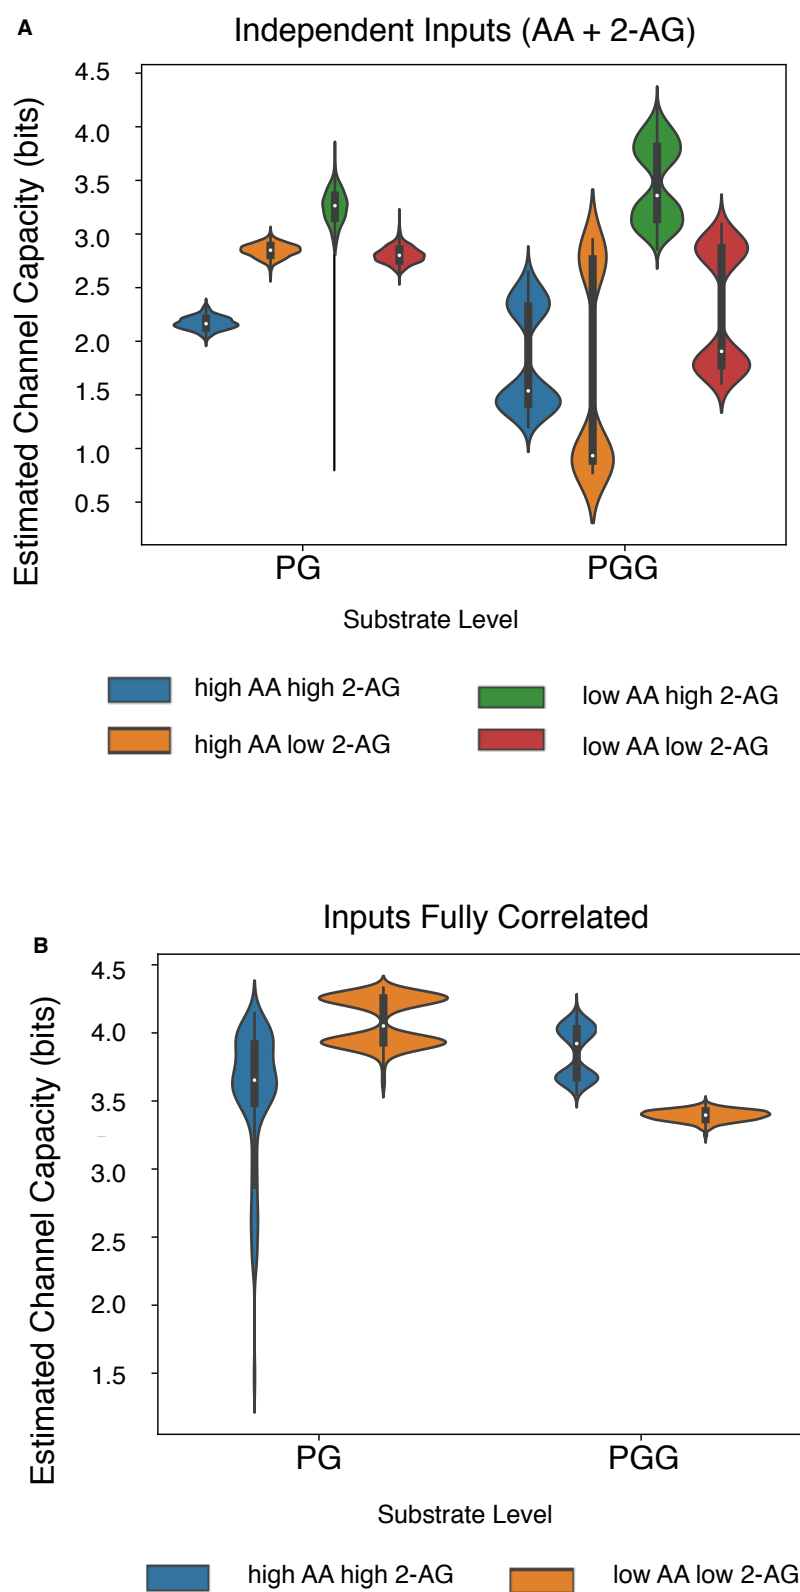

**Figure 6.** Effect of substrate level on estimated channel capacities between substrates and products in CORM. (A) Total Estimated Channel Capacity from AA and 2-AG combined to products across regions of substrate space. Distributions in the channel capacities arise from uncertainty in the kinetic parameter values after model calibration. (B) Estimated Channel Capacities from input to products when levels of AA and 2-AG are perfectly correlated across regions of substrate space. Distributions in the channel capacities arise from uncertainty in the kinetic parameter values after model calibration. <sup>11/16</sup>

252 We next tested whether the channel capacity between substrates and products varies with substrate level.  
253 We binned the input data into four quadrants (high or low values of either substrate) and calculated the  
254 channel capacity between inputs and outputs independently for each quadrant; input ranges were otherwise  
255 identical to those used for the calculations described above. Low substrate values spanned 0-8  $\mu\text{M}$  and  
256 high substrate values 8-16 $\mu\text{M}$ . Both independently varied inputs (Fig. 6A) and correlated inputs (Fig. 6B)  
257 yielded estimated channel capacities that were significantly different between the different regions of  
258 input space. In addition to differences in PG and PG-G channel capacity, we found that the distribution of  
259 information that passed through different intermediates changed with substrate concentration (Fig. S13  
260 and Fig. S14); certain paths to product had greater information transfer capacity at particular levels of  
261 substrates. This echoes findings from our pathway analysis (Figs. 2 and 3), indicating that changes in  
262 substrate concentration result in significant changes in how the enzyme executes its catalytic mechanism.  
263 Interestingly, we found no detectable correlation between the flux through a pathway and the mutual  
264 information between an input and an intermediate in that path (Fig. S15 and Fig. S16). We leave further  
265 investigation of the relationship between information transfer and actual physical reaction fluxes for future  
266 work.

267 Splitting the input space into different quadrants also revealed significant variation between different  
268 parameter sets, with most distributions showing significant bimodality across parameters (Fig. 6). This  
269 suggests that both the shape of the concentration-dependence curves, and the impact of “extrinsic noise”  
270 due to variation of one substrate independent of another, varies across parameter sets. Since all of these  
271 parameter sets are equally consistent with experimental data (Mitchener et al., 2015), this suggests that  
272 multiple modes of information flow are available to the COX-2 reaction network without significant  
273 changes to the core functionality of the enzyme.

## 274 DISCUSSION

275 *In vivo*, COX-2, AA, and 2-AG concentrations vary across cells in different tissues (Seibert et al.,  
276 1997; Monjazeb, 2006; Sugiura et al., 2006). In most tissues, AA processed by COX-2 is released  
277 from membrane phospholipids, predominantly through the action of cytosolic phospholipase A2 (Leslie,  
278 2015). In some tissues, (particularly the brain) a major source of AA is hydrolysis of 2-AG (Ignatowska-  
279 Jankowska et al., 2014; Long et al., 2008). In turn, 2-AG is also sourced from membrane phospholipids;  
280 through the sequential action of phospholipase C, which forms diacylglycerol (DAG), followed by  
281 conversion of DAG to 2-AG by DAG lipase (Fezza et al., 2014). Both DAG lipase and cytosolic  
282 phospholipase A2 are stimulated by increases in intracellular  $\text{Ca}^{2+}$  (Leslie, 2015; Bisogno et al., 2003).  
283 Thus, many stimuli (such as zymosan phagocytosis by macrophages (Rouzer and Marnett, 2005)) promote  
284 the release of AA and 2-AG simultaneously, with concentrations of AA typically higher than those of  
285 2-AG. Considering the precursor-product relationship between 2-AG and AA, however, it is conceivable  
286 that in some cells, the levels of the two substrates may change inversely to one another, or that the level of  
287 one may change while the other remains constant. These considerations suggest that the system features  
288 we find that vary with AA and 2-AG level (pathway entropy and information transfer capacity) are states  
289 accessible by the true biological system with the attendant repercussions for information transfer within  
290 that system. In addition, the postulated link between diet and the substrates available for COX-2 turnover  
291 (Chen, 2010) suggests that the information transfer properties of the system could be modulated by fatty  
292 acid intake.

293 COX-2 has significant regulatory flexibility: it is an allosteric protein, with multiple substrates and  
294 multiple allosteric regulators, all of which can influence how COX-2 operates on its substrates *in vivo*.  
295 The pathway analysis (Fig. 1B and 1C) suggests that COX-2 functions by first binding a substrate at  
296 the catalytic site, followed by binding of an allosteric regulator. Allosterism can be viewed as a shift  
297 in the conformational free-energy landscape sampled by COX-2 through preferential binding of the  
298 allosteric regulator to particular conformations (Lechtenberg et al., 2012; Nussinov and Tsai, 2013). From  
299 this perspective, modulating the concentrations of allosteric regulators in the COX-2 system shifts the  
300 conformational ensemble towards conformations favored by particular regulators. In the case of PG,  
301 these conformations are more easily turned over to product than the unmodulated enzyme, while for  
302 PG-G, the allosteric influence makes catalysis less energetically favorable (shifts the ensemble towards  
303 conformations that are less active). This allows COX-2 to manage the balance between PG and PG-G  
304 production in a more complex (and potentially farther-reaching) fashion than that provided by simple  
305 competition between substrates. This added complexity suggests a physiological reason why the COX-2

306 system would integrate information from multiple inputs: by adding a second competitive input, the  
307 system can access different responses than with a single input. Furthermore, the response dynamics  
308 of COX-2 gain even greater complexity because its inputs act as allosteric modulators in addition to  
309 substrates. The situation *in vivo* is likely far more complicated (and flexible) than considered here, as  
310 COX-2 has potential substrates in addition to AA and 2-AG (Rouzer and Marnett, 2009), and some  
311 nonsubstrate fatty acids that act as allosteric regulators (Dong et al., 2016b; Yuan et al., 2009; Dong et al.,  
312 2011, 2013, 2016a). In addition, many of the non-steroidal anti-inflammatory drugs that target COX-2  
313 also may bind at either the catalytic or allosteric site.

314 One advantage of this complexity may be the significant robustness of this system to variation in  
315 the kinetic parameters. The 5000 parameter sets we considered here all fit experimental data on PG  
316 and PG-G production equally well, despite variation of over three orders of magnitude in some of the  
317 parameter values (Mitchener et al., 2015). Our results on both pathway flux (Fig. 2) and information  
318 flow (Fig. 5) indicate that different parameter sets favor different distributions of paths from substrate to  
319 product, and transfer information through the network in different ways. Yet the overall function of the  
320 enzyme is the same despite all of this variation. *In vivo*, a change in the kinetic rates could correspond to  
321 a mutation or a change in the level of molecular crowding for the reaction. The availability of multiple  
322 “modes of execution” in this complex enzyme thus allow the system to be highly robust to such changes.  
323 This complex architecture could also allow the system to be highly evolveable through a mechanism of  
324 facilitated variation (Gerhart and Kirschner, 2007). We expect that future work on parameter variation  
325 will reveal major insights into the evolution of robustness in enzymes like COX-2.

326 In this work we applied a systems biochemistry framework to understand chemical reaction flux,  
327 pathway entropy, and information flow in the COX-2 system and investigate how these adjust to dynamic  
328 input concentrations and correlations. The methods and approach utilized here could be applied to  
329 further probe the COX-2 system by including more inputs (its other substrates, allosteric regulators, and  
330 inhibitors), or transferred to a larger, more complex network. Given the complexity present in even the  
331 simple network considered here, we predict that a systems biochemistry approach to larger networks  
332 would provide non-intuitive insights into the dynamics of the system as a whole.

## 333 **METHODS**

### 334 **Modeling and Model Calibration**

335 CORM was encoded as a PySB (Lopez et al., 2013) model containing 13 distinct biochemical species and  
336 29 chemical reactions. It was calibrated to experimental data consisting of PG and PG-G concentrations  
337 at steady state across a range of substrate concentrations (Mitchener et al., 2015; Shockley et al., 2017).

### 338 **Calculating Path Fluxes and Channel Capacities**

339 The method for determining paths of production and the total flux through a path is described in detail in  
340 SI Methods and Fig. S1. Channel capacities were calculated using the method from (Cheong et al., 2011)  
341 and the software of (Suderman et al., 2017). Extended detail is available in SI Methods.

342 The datasets generated during and/or analysed during the current study are available from the corre-  
343 sponding author on reasonable request.

## 344 **ACKNOWLEDGMENTS**

345 We would like to thank Dr. Blake A. Wilson for critical reading of the manuscript. We gratefully  
346 acknowledge funding from the National Science Foundation (1411482 to C.F.L.), National Cancer  
347 Institute (U01CA215845 to V.Q. and C.F.L.), Defense Advanced Research Projects Agency (Cooperative  
348 Agreement no. W911 NF-14-2-0022 to C.F.L.).

## 349 **COMPETING INTERESTS**

350 The Authors declare no competing financial or non-financial interests.

## 351 **AUTHOR CONTRIBUTIONS**

352 Conceptualization: EMS, CFL; Methodology: EMS, CFL, EJD; Investigation: EMS, CFL, EJD, CAR,  
353 LJM; Resources: CFL, LJM; Analysis: CFL, EMS, EJD, CAR; Writing original draft: EMS, CFL;

354 Writing Review and Editing: EMS, CFL, EJD, CAR, LJM; Supervision: CFL; Funding Acquisition: CFL,  
355 LJM

## 356 REFERENCES

- 357 Adlung, L., Kar, S., Wagner, M.-C., She, B., Chakraborty, S., Bao, J., Lattermann, S., Boerries, M., Busch,  
358 H., Wuchter, P., Ho, A. D., Timmer, J., Schilling, M., Höfer, T., and Klingmüller, U. (2017). Protein  
359 abundance of AKT and ERK pathway components governs cell type-specific regulation of proliferation.  
360 *Molecular Systems Biology*, 13(1):904.
- 361 Alhouayek, M. and Muccioli, G. G. (2014). COX-2-derived endocannabinoid metabolites as novel  
362 inflammatory mediators. *Trends in Pharmacological Sciences*, 35(6):284–292.
- 363 Bisogno, T., Howell, F., Williams, G., Minassi, A., Cascio, M. G., Ligresti, A., Matias, I., Schiano-  
364 Moriello, A., Paul, P., Williams, E.-J., Gangadharan, U., Hobbs, C., Di Marzo, V., and Doherty,  
365 P. (2003). Cloning of the first sn1-DAG lipases points to the spatial and temporal regulation of  
366 endocannabinoid signaling in the brain. *The Journal of Cell Biology*, 163(3):463–468.
- 367 Briggs, G. E. and Haldane, J. B. (1925). A Note on the Kinetics of Enzyme Action. *Biochemical Journal*,  
368 19(2):338–339.
- 369 Chen, C. (2010). Lipids: COX-2's new role in inflammation. *Nature Chemical Biology*,  
370 6(6):nchembio.375–402.
- 371 Chen, J.-Y., Lin, J.-R., Cimprich, K. A., and Meyer, T. (2012). A two-dimensional ERK-AKT signaling  
372 code for an NGF-triggered cell-fate decision. *Molecular Cell*, 45(2):196–209.
- 373 Cheong, R., Rhee, A., Wang, C. J., Nemenman, I., and Levchenko, A. (2011). Information transduction  
374 capacity of noisy biochemical signaling networks. *Science*, 334(6054):354–358.
- 375 Dong, L., Sharma, N. P., Jurban, B. J., and Smith, W. L. (2013). Pre-existent asymmetry in the human  
376 cyclooxygenase-2 sequence homodimer. *The Journal of biological chemistry*, 288(40):28641–28655.
- 377 Dong, L., Vecchio, A. J., Sharma, N. P., Jurban, B. J., Malkowski, M. G., and Smith, W. L. (2011).  
378 Human cyclooxygenase-2 is a sequence homodimer that functions as a conformational heterodimer.  
379 *The Journal of biological chemistry*, 286(21):19035–19046.
- 380 Dong, L., Zou, H., Yuan, C., Hong, Y. H., Kuklev, D. V., and Smith, W. L. (2016a). Different Fatty Acids  
381 Compete with Arachidonic Acid for Binding to the Allosteric or Catalytic Subunits of Cyclooxygenases  
382 to Regulate Prostanoid Synthesis. *The Journal of biological chemistry*, 291(8):4069–4078.
- 383 Dong, L., Zou, H., Yuan, C., Hong, Y. H., Uhlson, C. L., Murphy, R. C., and Smith, W. L. (2016b).  
384 Interactions of 2-O-arachidonylglycerol ether and ibuprofen with the allosteric and catalytic subunits of  
385 human COX-2. *Journal of lipid research*, 57(6):1043–1050.
- 386 Fezza, F., Bari, M., Florio, R., Talamonti, E., Feole, M., and Maccarrone, M. (2014). Endocannabinoids,  
387 Related Compounds and Their Metabolic Routes. *Molecules*, 19(11):17078–17106.
- 388 Funk, C. D. (2001). Prostaglandins and leukotrienes: advances in eicosanoid biology. *Science*,  
389 294(5548):1871–1875.
- 390 Gerhart, J. and Kirschner, M. (2007). The theory of facilitated variation. *Proceedings of the National  
391 Academy of Sciences*, 104(suppl 1):8582–8589.
- 392 Huang, S. (2009). Non-genetic heterogeneity of cells in development: more than just noise. *Development  
393 (Cambridge, England)*, 136(23):3853–3862.
- 394 Ignatowska-Jankowska, B. M., Ghosh, S., Crowe, M. S., Kinsey, S. G., Niphakis, M. J., Abdullah, R. A.,  
395 Tao, Q., O' Neal, S. T., Walentiny, D. M., Wiley, J. L., Cravatt, B. F., and Lichtman, A. H. (2014). In  
396 vivo characterization of the highly selective monoacylglycerol lipase inhibitor KML29: antinociceptive  
397 activity without cannabimimetic side effects. *British Journal of Pharmacology*, 171(6):1392–1407.
- 398 Kudalkar, S. N., Nikas, S. P., Kingsley, P. J., Xu, S., Galligan, J. J., Rouzer, C. A., Banerjee, S., Ji, L., Eno,  
399 M. R., Makriyannis, A., and Marnett, L. J. (2015). 13-Methylarachidonic Acid Is a Positive Allosteric  
400 Modulator of Endocannabinoid Oxygenation by Cyclooxygenase. *Journal of Biological Chemistry*,  
401 290(12):7897–7909.
- 402 Kulmacz, R. J. and Lands, W. E. (1984). Prostaglandin H synthase. Stoichiometry of heme cofactor.  
403 *Journal of Biological Chemistry*, 259(10):6358–6363.
- 404 Kulmacz, R. J. and Lands, W. E. (1985). Stoichiometry and kinetics of the interaction of prostaglandin H  
405 synthase with anti-inflammatory agents. *Journal of Biological Chemistry*, 260(23):12572–12578.
- 406 Lawrence, T. (2009). The nuclear factor NF-kappaB pathway in inflammation. *Cold Spring Harbor  
407 Perspectives in Biology*, 1(6):a001651–a001651.



- 408 Lechtenberg, B. C., Freund, S. M. V., and Huntington, J. A. (2012). An ensemble view of thrombin  
409 allostery. *Biological chemistry*, 393(9):889–898.
- 410 Leslie, C. C. (2015). Cytosolic phospholipase A2: physiological function and role in disease. *Journal of*  
411 *lipid research*, 56(8):1386–1402.
- 412 Long, J. Z., Li, W., Booker, L., Burston, J. J., Kinsey, S. G., Schlosburg, J. E., Pavón, F. J., Serrano,  
413 A. M., Selley, D. E., Parsons, L. H., Lichtman, A. H., and Cravatt, B. F. (2008). Selective blockade of  
414 2-arachidonoylglycerol hydrolysis produces cannabinoid behavioral effects. *Nature Chemical Biology*,  
415 5(1):37–44.
- 416 Lopez, C. F., Muhlich, J. L., Bachman, J. A., and Sorger, P. K. (2013). Programming biological models in  
417 Python using PySB. *Molecular Systems Biology*, 9(1):646–646.
- 418 Lorendeau, D., Christen, S., Rinaldi, G., and Fendt, S.-M. (2015). Metabolic control of signalling  
419 pathways and metabolic auto-regulation. *Biology of the cell*, 107(8):251–272.
- 420 Mitchell, S., Roy, K., Zangle, T. A., and Hoffmann, A. (2018). Nongenetic origins of cell-to-cell variability  
421 in B lymphocyte proliferation. *Proceedings of the National Academy of Sciences of the United States*  
422 *of America*, 115(12):E2888–E2897.
- 423 Mitchener, M. M., Hermanson, D. J., Shockley, E. M., Brown, H. A., Lindsley, C. W., Reese, J., Rouzer,  
424 C. A., Lopez, C. F., and Marnett, L. J. (2015). Competition and allostery govern substrate selectivity of  
425 cyclooxygenase-2. *Proceedings of the National Academy of Sciences of the United States of America*,  
426 112(40):12366–12371.
- 427 Monjazebe, A. M. (2006). Arachidonic acid-induced gene expression in colon cancer cells. *Carcinogenesis*,  
428 27(10):1950–1960.
- 429 Nussinov, R. and Tsai, C.-J. (2013). Allostery in Disease and in Drug Discovery. *Cell*, 153(2):293–305.
- 430 Rimon, G., Sidhu, R. S., Lauver, D. A., Lee, J. Y., Sharma, N. P., Yuan, C., Frieler, R. A., Trievel, R. C.,  
431 Lucchesi, B. R., and Smith, W. L. (2010). Coxibs interfere with the action of aspirin by binding tightly  
432 to one monomer of cyclooxygenase-1. *Proceedings of the National Academy of Sciences of the United*  
433 *States of America*, 107(1):28–33.
- 434 Rouzer, C. A. and Marnett, L. J. (2003). Mechanism of free radical oxygenation of polyunsaturated fatty  
435 acids by cyclooxygenases. *Chemical Reviews*, 103(6):2239–2304.
- 436 Rouzer, C. A. and Marnett, L. J. (2005). Glycerylprostaglandin Synthesis by Resident Peritoneal  
437 Macrophages in Response to a Zymosan Stimulus. *Journal of Biological Chemistry*, 280(29):26690–  
438 26700.
- 439 Rouzer, C. A. and Marnett, L. J. (2009). Cyclooxygenases: structural and functional insights. *Journal of*  
440 *lipid research*, 50 Suppl(Supplement):S29–34.
- 441 Rouzer, C. A. and Marnett, L. J. (2011). Endocannabinoid Oxygenation by Cyclooxygenases, Lipoxyge-  
442 nases, and Cytochromes P450: Cross-Talk between the Eicosanoid and Endocannabinoid Signaling  
443 Pathways. *Chemical Reviews*, 111(10):5899–5921.
- 444 Santos, S. D. M., Verveer, P. J., and Bastiaens, P. I. H. (2007). Growth factor-induced MAPK network  
445 topology shapes Erk response determining PC-12 cell fate. *Nature Cell Biology*, 9(3):324–330.
- 446 Seibert, K., Zhang, Y., Leahy, K., Hauser, S., Masferrer, J., and Isakson, P. (1997). Distribution of Cox-1  
447 and Cox-2 in Normal and Inflamed Tissues. In *Eicosanoids and Other Bioactive Lipids in Cancer,*  
448 *Inflammation, and Radiation Injury 2*, pages 167–170. Springer US, Boston, MA.
- 449 Selimkhanov, J., Taylor, B., Yao, J., Pilko, A., Albeck, J., Hoffmann, A., Tsimring, L., and Wollman, R.  
450 (2014). Systems biology. Accurate information transmission through dynamic biochemical signaling  
451 networks. *Science*, 346(6215):1370–1373.
- 452 Shannon, C. E. (1948). A Mathematical Theory of Communication. pages 1–55.
- 453 Shi, T., Niepel, M., McDermott, J. E., Gao, Y., Nicora, C. D., Chrisler, W. B., Markillie, L. M., Petyuk,  
454 V. A., Smith, R. D., Rodland, K. D., Sorger, P. K., Qian, W.-J., and Wiley, H. S. (2016). Conservation  
455 of protein abundance patterns reveals the regulatory architecture of the EGFR-MAPK pathway. *Science*  
456 *Signaling*, 9(436):rs6–rs6.
- 457 Shockley, E. M., Vrugt, J. A., and Lopez, C. F. (2017). PyDREAM: high-dimensional parameter inference  
458 for biological models in python. *Bioinformatics*, 18:343.
- 459 Smith, W. L., DeWitt, D. L., and Garavito, R. M. (2000). Cyclooxygenases: structural, cellular, and  
460 molecular biology. *Annual review of biochemistry*, 69(1):145–182.
- 461 Spencer, S. L., Gaudet, S., Albeck, J. G., Burke, J. M., and Sorger, P. K. (2009). Non-genetic origins of  
462 cell-to-cell variability in TRAIL-induced apoptosis. *Nature*, 459(7245):428–432.

- 463 Suderman, R., Bachman, J. A., Smith, A., Sorger, P. K., and Deeds, E. J. (2017). Fundamental trade-offs  
464 between information flow in single cells and cellular populations. *Proceedings of the National Academy  
465 of Sciences of the United States of America*, 114(22):5755–5760.
- 466 Sugiura, T., Kishimoto, S., Oka, S., and Gokoh, M. (2006). Biochemistry, pharmacology and physiology  
467 of 2-arachidonoylglycerol, an endogenous cannabinoid receptor ligand. *Progress in Lipid Research*,  
468 45(5):405–446.
- 469 Waite, A. J., Frankel, N. W., Dufour, Y. S., Johnston, J. F., Long, J., and Emonet, T. (2016). Non-genetic  
470 diversity modulates population performance. *Molecular Systems Biology*, 12(12):895.
- 471 Yuan, C., Sidhu, R. S., Kuklev, D. V., Kado, Y., Wada, M., Song, I., and Smith, W. L. (2009). Cyclooxyge-  
472 nase Allosterism, Fatty Acid-mediated Cross-talk between Monomers of Cyclooxygenase Homodimers.  
473 *Journal of Biological Chemistry*, 284(15):10046–10055.
